# Supplementary material for: Direct solvothermal phosphorization of nickel foam to fabricate integrated Ni2P-nanorods/Ni electrodes for efficient electrocatalytic hydrogen evolution
Source: Royal Society of Chemistry journal article supplement (doi:10.1039/c5cc00370a), 2015-01-01
Supplement: c5cc00370a1.pdf [file c5cc00370a1.pdf]

Electronic Supplementary Information (ESI) for

**Direct solvothermal phosphorization of nickel foam to  
fabricate integrated Ni<sub>2</sub>P-nanorods/Ni electrodes for efficient  
electrocatalytic hydrogen evolution**

Xiaoguang Wang, Yury V. Kolen'ko, Lifeng Liu\*

*International Iberian Nanotechnology Laboratory (INL), Av. Mestre Jose Veiga, 4715-  
330 Braga, Portugal*

E-mail: [lifeng.liu@inl.int](mailto:lifeng.liu@inl.int)

CONTENTS

1. Experimental details
2. Supplementary figures
3. Supplementary tables

## 1. Experimental Details

### Fabrication of integrated Ni<sub>2</sub>P-nanorods/Ni electrodes:

Nickel (Ni) foam was purchased from Heze Jiaotong Co. Ltd (110 PPI, 480 g m<sup>-2</sup>, nominal thickness 0.3 mm). Before phosphorization, the Ni foam was cleaned in 6 M HCl (Sigma-Aldrich) by ultrasonication for 10 min, subsequently washed by water and acetone, and then dried at 50 °C for 10 min. Afterwards, around 0.2 g of Ni foam (ca. 2.4 × 2.4 cm piece) and 0.1 g of amorphous red phosphorous (Alfa Aesar, 98.9%) were loaded into a PTFE reaction cup (total volume 45 mL). 30 mL of anhydrous ethylenediamine (TCI, 98.0%) was then added into the reaction cup as a solvent. The PTFE cup was sealed by a PTFE cover, and fitted into a stainless steel autoclave. Subsequently, the autoclave was sealed, hand shaken and placed into a heating oven. The best results were achieved when the reaction was performed at 200 °C for 48 h under an autogenous pressure. The resultant foam sample was cleaned by 5 min ultrasonication in deionized (DI) water, then in ethanol, and finally in acetone. After solvothermal treatment, the originally shiny grey Ni foam turned to blackish and became quite brittle (**Figure S1**, inset). The original macroporous morphology, however, was preserved.

### Structural characterization:

The morphology and microstructure of the as-prepared Ni<sub>2</sub>P nanorods were characterized by scanning electron microscopy (SEM, Quanta 650 FEG, FEI) and aberration-corrected transmission electron microscopy (TEM, Titan ChemiSTEM 80-200, FEI, operating at 200 kV). The chemical composition of Ni<sub>2</sub>P nanorods was analyzed by energy dispersive X-ray spectroscopy (EDX) in scanning TEM mode. For TEM investigation, the Ni<sub>2</sub>P-nanorods/Ni was pulverized and dispersed in isopropanol (Sigma, 99%) by ultrasonication. A drop of suspension was then placed on a carbon-coated copper grid. The grid was subsequently dried at 110 °C in a vacuum oven for 1 h. Powder X-ray diffraction (XRD) analysis was carried out on a X'Pert PRO diffractometer (PANalytical) set at 45 kV and 40 mA with Cu K $\alpha$  radiation ( $\lambda$  = 1.541874 Å) and a PIXcel detector. Data were collected using Bragg-Brentano configuration in the 2 $\theta$  range of 20°-80° with a scan speed of 0.01° s<sup>-1</sup>. The XRD

patterns were indexed according to the International Centre for Diffraction Data (ICDD) PDF-4+ database. The phase composition analysis was carried out using HighScore software package (PANalytical).

#### Electrochemical Measurements:

All electrochemical measurements were conducted in a typical three-electrode cell with a N<sub>2</sub>-saturated aqueous electrolyte of 0.5 M H<sub>2</sub>SO<sub>4</sub> (pH = 0.28) using the as-prepared Ni<sub>2</sub>P-nanorods/Ni foam as the working electrode, a graphite plate as the counter electrode, and a saturated calomel electrode (SCE) as the reference. For comparison, the electrocatalytic performance of a polished Pt foil (Alfa Aesar, 99.9%) and a bare Ni foam was tested under the same conditions as those used for the Ni<sub>2</sub>P-nanorods/Ni electrode. Prior to the electrochemical measurement, the electrolyte was deaerated via bubbling of high-purity N<sub>2</sub> (99.999%) for 30 min, then maintaining the bubbling throughout the whole test to avoid any possible contribution from oxygen reduction. The electrochemical data were recorded using a Biologic VMP-3 potentiostat/galvanostat at room temperature (~ 25 °C). Line sweep voltammetry (LSV) curves were measured at a sweep rate of 10 mV s<sup>-1</sup>. The obtained LSV curves were corrected by the *iR* loss according to the following equation:

$$E_{\text{corr}} = E_{\text{mea}} - iR_s \quad (\text{eq. S1})$$

Where  $E_{\text{corr}}$  is the corrected potential,  $E_{\text{mea}}$  the measured potential and  $R_s$  the equivalent series resistance determined by electrochemical impedance spectroscopy (EIS). The accelerated degradation test (ADT) was conducted at a scan rate of 50 mV s<sup>-1</sup> by performing cyclic voltammetry between -200 and 60 mV vs. RHE for 1000 continuous cycles. EIS measurements were carried out at different potentials in the frequency range of 10<sup>5</sup> to 0.05 Hz with a 10 mV sinusoidal perturbation. Unless otherwise specified, all potentials are reported versus reversible hydrogen electrode (RHE) by converting the potentials measured vs. SCE according to the following equation:

$$E \text{ (RHE)} = E \text{ (SCE)} + 0.241 + 0.059 \text{ pH} \quad (\text{eq. S2})$$

## Supplementary Figures:

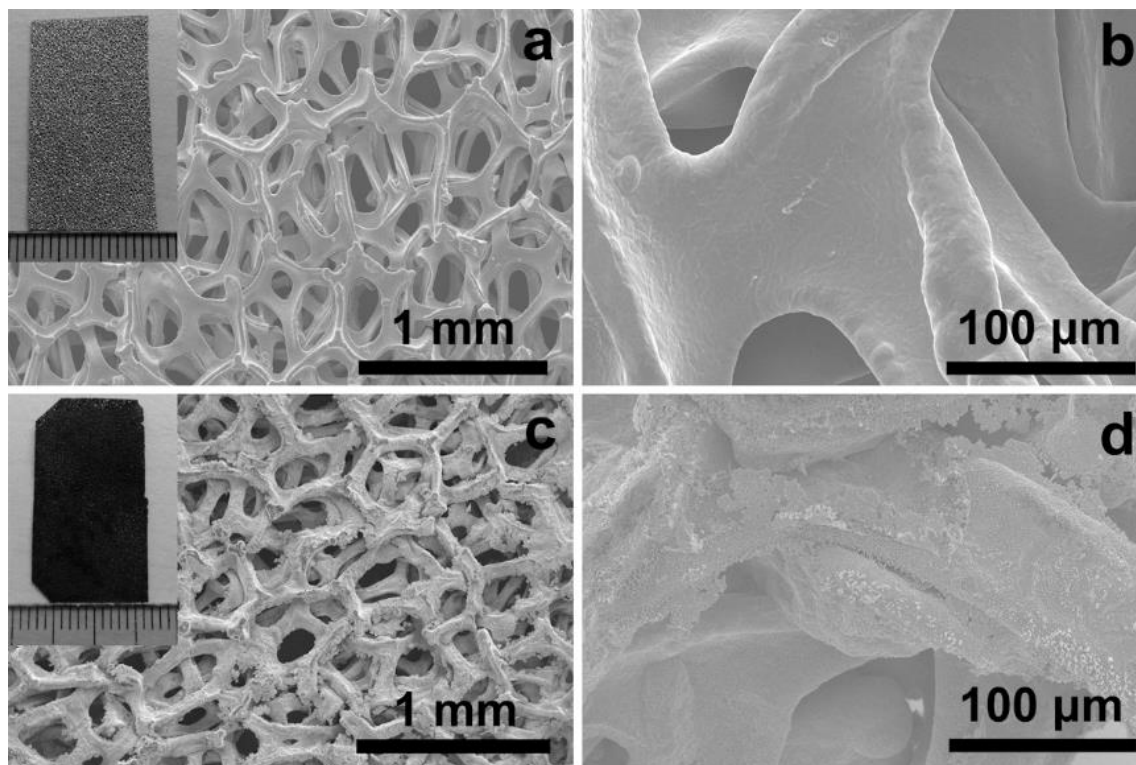

**Fig. S1** SEM micrographs showing the morphology of a Ni foam (a, b) before and (c, d) after the phosphorization treatment under solvothermal conditions. The insets in (a) and (c) show the corresponding samples.

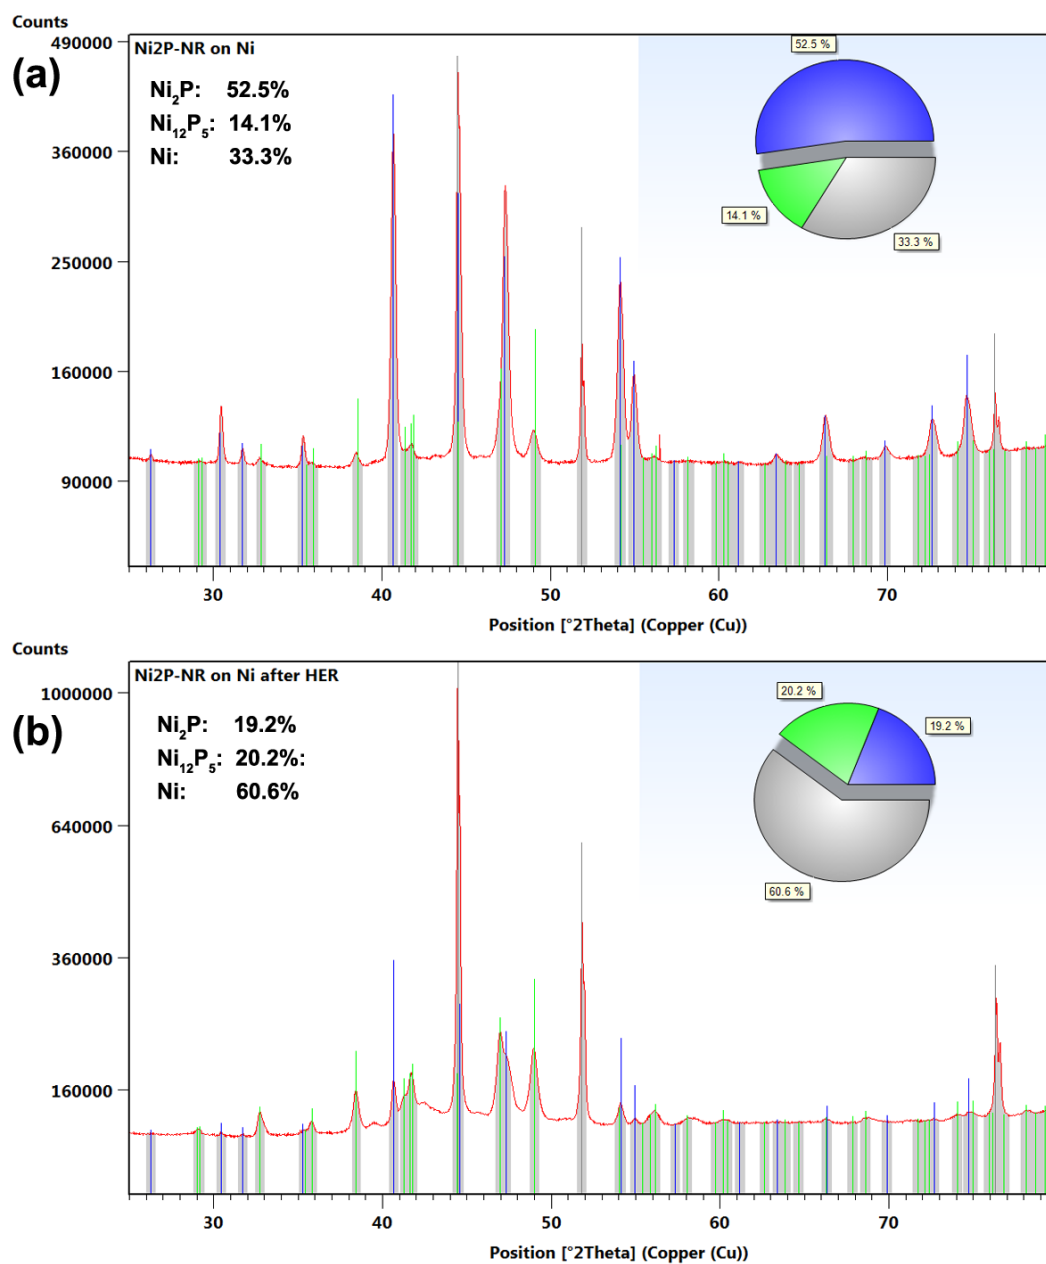

**Fig. S2** Phase composition analysis of the Ni<sub>2</sub>P-NRs/Ni composite electrode (a) before and (b) after the stability and durability tests.

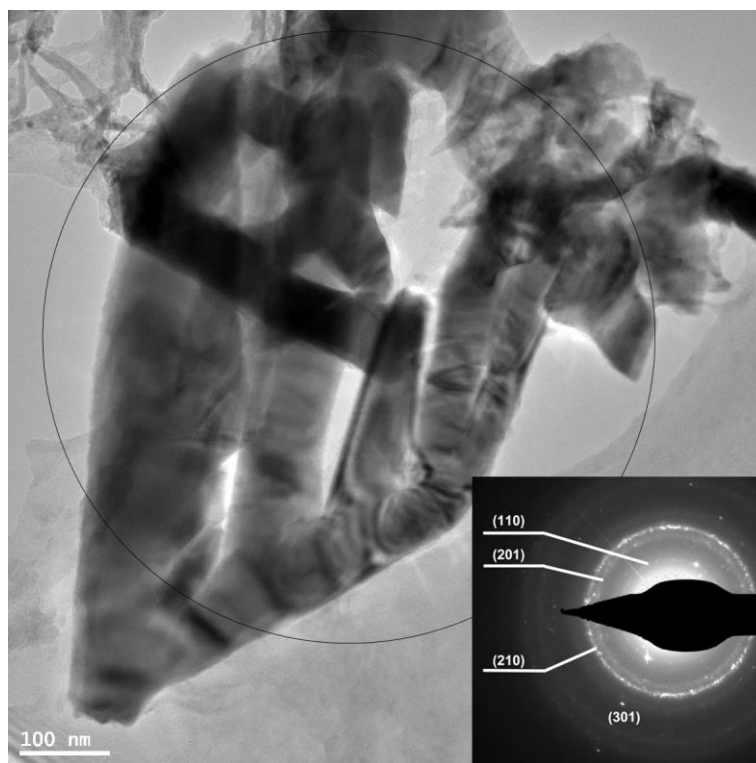

**Fig. S3** Representative TEM image showing the morphology of the Ni<sub>2</sub>P NRs. Inset: selected-area electron diffraction (SAED) pattern.

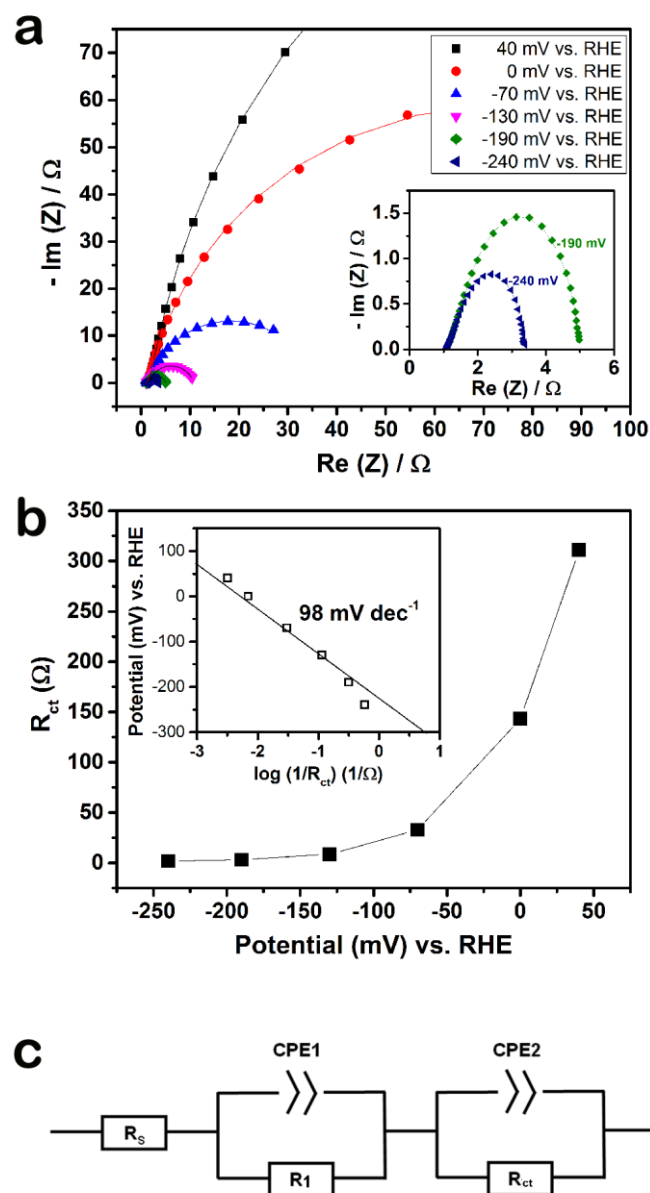

**Fig. S4** (a) Nyquist plots of the  $\text{Ni}_2\text{P}$ -NRs/Ni electrode recorded at different applied overpotentials in the frequency range of  $10^5 - 0.05$  Hz. Symbols: experimental data; thin lines: fit curves. Inset: zoomed view of the plots measured at -190 and -240 mV. (b) The dependence of charge transfer resistance ( $R_{ct}$ ) on the applied overpotentials. Inset: overpotential vs.  $\log(1/R_{ct})$ . The symbols and thin line represent experimental data and their linear fit, respectively. (c) The equivalent circuit model used to fit the Nyquist plots shown in (a).  $R_s$  represents the equivalent series resistance,  $R_1$  the electron/charge transport resistance in  $\text{Ni}_2\text{P}$ -NRs, and  $R_{ct}$  the charge transfer resistance at the electrode/electrolyte interface.

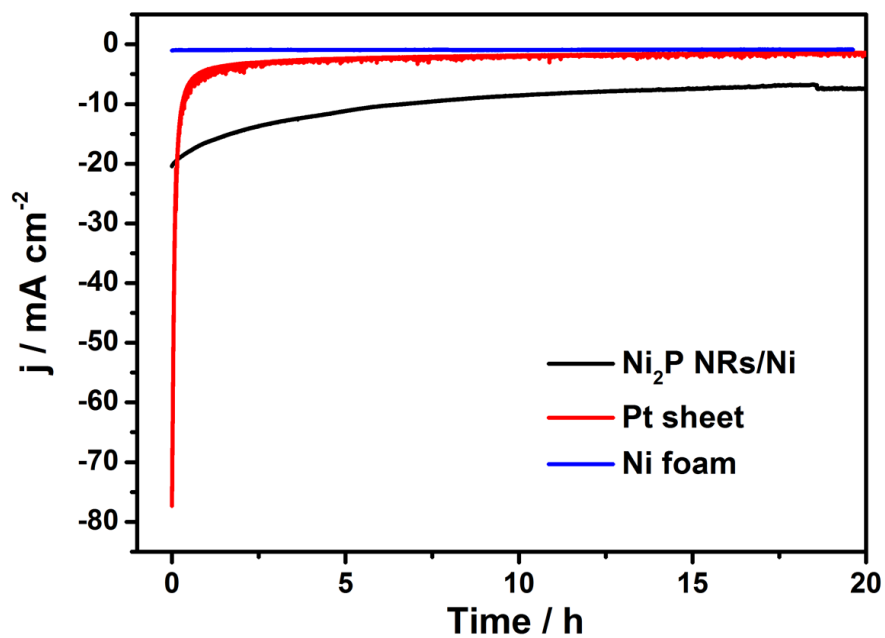

**Fig. S5** Chronoamperometric profiles of Ni<sub>2</sub>P-NRs/Ni composite electrode, bare Ni foam and Pt sheet, recorded at -200 mV vs. RHE in N<sub>2</sub>-saturated 0.5 M H<sub>2</sub>SO<sub>4</sub> solution.



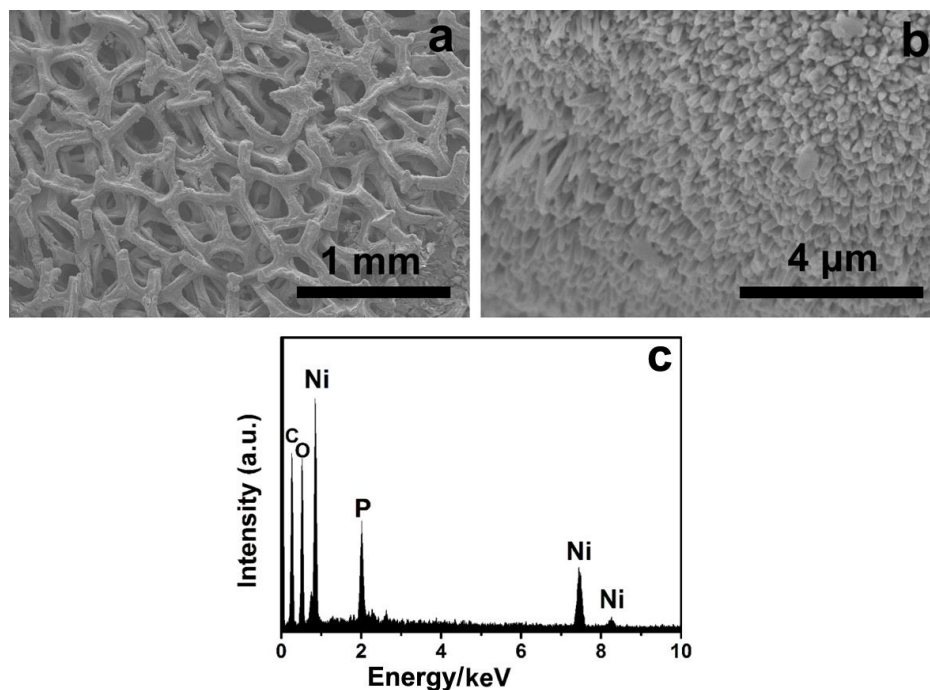

**Fig. S6** (a) Low-, (b) high-magnification SEM images and (c) EDX spectrum of the  $\text{Ni}_2\text{P}$ -NRs/Ni electrode after accelerated degradation test for 1000 continuous cycles and subsequent chronoamperometric test at -200 mV for 20 h. It shows that the rod-like morphology virtually remains unchanged, but the content of O is dramatically increased in the tested electrode.

## Supplementary Tables:

**Table S1.** Electrocatalytic performance of Ni<sub>2</sub>P-NRs/Ni electrode in comparison with that of non-previous HER catalysts reported in the literature.

| Catalyst                                          | $\eta_{10}$<br>(mV vs. RHE) | $\eta_{20}$<br>(mV vs. RHE) | $j_0$ (mA cm <sup>-2</sup> )            | Reference        |
|---------------------------------------------------|-----------------------------|-----------------------------|-----------------------------------------|------------------|
| MoS <sub>2</sub> /RGO                             | -150                        | -176                        |                                         | [3b]             |
| CoP                                               | -226                        | -275                        | $1.9 \times 10^{-2}$                    | [8b]             |
| FeP<br>nanosheets/GC                              | -240                        | -320                        |                                         | [9c]             |
| MoP                                               | -135                        | -167                        | $3.4 \times 10^{-2}$                    | [11]             |
| Bulk crystalline<br>WP                            | -200                        | -223                        |                                         | [12]             |
| Defect-rich MoS <sub>2</sub><br>nanosheets        | -190                        | -214                        | $8.91 \times 10^{-3}$                   | [S1]             |
| WS <sub>2</sub> nanosheets                        | -233                        | -275                        |                                         | [6]              |
| Bulk Mo <sub>2</sub> C                            | -208                        | -224                        | $1.3 \times 10^{-3}$                    | [15]             |
| Bulk MoB                                          | -212                        | -227                        | $1.4 \times 10^{-3}$                    | [15]             |
| Cu <sub>3</sub> P NW/CF                           | -143                        | -157                        | $1.8 \times 10^{-1}$                    | [10]             |
| Cu <sub>3</sub> P MP/CF                           | -200                        | -283                        | $4.0 \times 10^{-2}$                    | [10]             |
| Core-shell MoO <sub>3</sub> -<br>MoS <sub>2</sub> | -255                        | -270                        | $8.2 \times 10^{-5}$                    | [S2]             |
| MoS <sub>2</sub> @Au                              | -226                        |                             | $9.3 \times 10^{-3}$                    | [S3]             |
| MoS <sub>2</sub><br>nanosheets/GC                 | -187                        | -210                        |                                         | [S4]             |
| MoS <sub>2</sub> /graphene/Ni<br>foam             | 141                         | 180                         |                                         | [S5]             |
| MoS <sub>2.7</sub> @NPG                           | -220                        | -245                        |                                         | [S6]             |
| <b>Ni<sub>2</sub>P-NRsNi</b>                      | <b>-131</b>                 | <b>-163</b>                 | <b><math>8.62 \times 10^{-2}</math></b> | <b>This work</b> |

**Table S2.** Comparison of electrocatalytic performance of the Ni<sub>2</sub>P-NRs/Ni composite electrode with that of the nickel phosphide catalysts reported in the literature.

| Catalyst                            | Electrolyte                                       | Counter electrode         | Onset potential (mV) | $\eta_{10}$ (mV) | $\eta_{20}$ (mV) | Tafel slope (mV dec <sup>-1</sup> )                     | $j_0$ (mA cm <sup>-2</sup> )                                                                | Reference |
|-------------------------------------|---------------------------------------------------|---------------------------|----------------------|------------------|------------------|---------------------------------------------------------|---------------------------------------------------------------------------------------------|-----------|
| Ni <sub>2</sub> P NPs on Ti         | 0.5 M H <sub>2</sub> SO <sub>4</sub> solution     | RuO <sub>2</sub> /Ti mesh | 45                   | 90               | 130              | 46<br>( $\eta=25-125mV$ )<br>81<br>( $\eta=150-200mV$ ) | $3.3 \times 10^{-2}$<br>( $\eta=25-125mV$ )<br>$4.9 \times 10^{-1}$<br>( $\eta=150-200mV$ ) | [7a]      |
| Ni <sub>2</sub> P NPs/GC            | 1 M H <sub>2</sub> SO <sub>4</sub> solution       | Pt                        | 50                   | 120              | 140              | 87<br>( $\eta=60-140mV$ )                               |                                                                                             | [7b]      |
| Ni <sub>2</sub> P NPs/Ti            | 1 M H <sub>2</sub> SO <sub>4</sub> solution       | Graphite                  | 60                   | 120              | 138              | 60<br>( $\eta=70-150mV$ )                               |                                                                                             | [7c]      |
| Ni <sub>2</sub> P NRs/GC            | 0.5 M H <sub>2</sub> SO <sub>4</sub> solution     | Pt                        | 60                   | 265              | 330              | 112                                                     | $5.1 \times 10^{-2}$                                                                        | [7f]      |
| Ni <sub>2</sub> P NRs/Ti            | 0.5 M H <sub>2</sub> SO <sub>4</sub> solution     | Pt                        | 150                  | 500              | 650              | 144                                                     | $3.7 \times 10^{-2}$                                                                        | [7f]      |
| Ni <sub>2</sub> P NRs/Ti (annealed) | 0.5 M H <sub>2</sub> SO <sub>4</sub> solution     | Pt                        | 60                   | 180              | 200              | 76                                                      | $4.3 \times 10^{-2}$                                                                        | [7f]      |
| Ni <sub>2</sub> P NCs/GC            | 0.5 M H <sub>2</sub> SO <sub>4</sub> solution     | Pt                        | 62                   | 137              | 180              | 49                                                      |                                                                                             | [7d]      |
| Ni <sub>2</sub> P/C                 | 0.5 M H <sub>2</sub> SO <sub>4</sub> solution     | Pt                        | 60                   | 87               | 115              | 54                                                      |                                                                                             | [S7]      |
| Ni <sub>2</sub> P                   | 0.5 M H <sub>2</sub> SO <sub>4</sub> solution     | Pt                        | 125                  | 225              |                  | 86                                                      |                                                                                             | [S7]      |
| <b>This work</b>                    | <b>0.5 M H<sub>2</sub>SO<sub>4</sub> solution</b> | <b>Graphite</b>           | <b>33</b>            | <b>131</b>       | <b>163</b>       | <b>106.1</b>                                            | <b><math>8.62 \times 10^{-2}</math></b>                                                     |           |

**Table S3.** Electrochemical impedance parameters obtained by fitting the Nyquist plots to the equivalent circuit model.

| Potentials<br>(mV) | $R_s$<br>( $\Omega$ ) | $R_1$<br>( $\Omega$ ) | $Q_1$<br>(F cm <sup>-2</sup> ) | $m_1$       | $R_{ct}$<br>( $\Omega$ ) | $Q_2$<br>(F cm <sup>-2</sup> ) | $m_2$       |
|--------------------|-----------------------|-----------------------|--------------------------------|-------------|--------------------------|--------------------------------|-------------|
| 40                 | 1.07                  | 2.47                  | 0.182                          | 0.43        | 310.90                   | 0.0148                         | 0.92        |
| <b>0</b>           | <b>1.03</b>           | <b>0.66</b>           | <b>0.160</b>                   | <b>0.46</b> | <b>143.20</b>            | <b>0.0199</b>                  | <b>0.87</b> |
| -70                | 1.07                  | 0.91                  | 0.123                          | 0.47        | 32.90                    | 0.0224                         | 0.86        |
| -130               | 1.07                  | 1.02                  | 0.129                          | 0.46        | 8.68                     | 0.0210                         | 0.85        |
| -190               | 1.08                  | 0.78                  | 0.0749                         | 0.52        | 3.16                     | 0.0170                         | 0.90        |
| -240               | 1.08                  | 0.59                  | 0.0635                         | 0.54        | 1.73                     | 0.0166                         | 0.91        |

## References:

- [S1] J. Xie, H. Zhang, S. Li, R. Wang, X. Sun, M. Zhou, J. Zhou, X.W. Lou and Y. Xie, *Adv. Mater.*, 2013, **25**, 5807-5813.
- [S2] Z. Chen, D. Cummins, B. N. Reinecke, E. Clark, M. K. Sunkara and T. F. Jaramillo, *Nano Lett.*, 2011, **11**, 4168-4175.
- [S3] T. Y. Wang, L. Liu, Z. W. Zhu, P. Papakonstantinou, J. B. Hu and M. Li, *Energy Environ. Sci.*, 2013, **6**, 625-633.
- [S4] M. A. Lukowski, A. S. Daniel, F. Meng, A. Forticaux, L. S. Li and S. Jin, *J. Am. Chem. Soc.*, 2013, **135**, 10274-10277.
- [S5] Y. H. Chang, C. T. Lin, T. Y. Chen, C. L. Hsu, Y. S. Lee, W. J. Zhang, K. H. Wei and L. J. Li, *Adv. Mater.*, 2013, **25**, 756-760.
- [S6] X. B. Ge, L. Y. Chen, L. Zhang, Y. R. Wen, A. Hirata and M. W. Chen, *Adv. Mater.*, 2014, **26**, 3100-3104.
- [S7] Y. J. Bai, H. J. Zhang, X. Li, L. Liu, H. T. Xu, H. J. Qiu and Y. Wang, *Nanoscale*, 2015, **7**, 1446-1453.
